# Supplementary material for: A transferable prediction model of molecular adsorption on metals based on adsorbate and substrate properties
Source: Royal Society of Chemistry journal article supplement (doi:10.1039/d2cp01572b), 2022-01-01
Supplement: d2cp01572b1.csv [file d2cp01572b1.csv]

Label	Ead_data	Ead_pred	Ead_pred_err	CE	IPEA-W	MBE_2
CH4(g)+Ag(111) - CH3*+H*+Ag(111)	1.99	2.09	0.4	2.95	0.758	2.4837
CH4(g)+Au(111) - CH3*+H*+Au(111)	1.51	1.65	0.51	3.81	1.578	2.034
CH4(g)+Co(111) - CH3*+H*+Co(111)	0.31	-0.34	0.48	4.39	1.398	0.1698
CH4(g)+Cu(111) - CH3*+H*+Cu(111)	1.05	1.16	0.44	3.49	1.128	1.5727
CH4(g)+Ir(111) - CH3*+H*+Ir(111)	0.15	-0.73	0.73	6.94	1.838	0.137
CH4(g)+Ni(111) - CH3*+H*+Ni(111)	0.41	-0.13	0.5	4.44	1.518	0.3589
CH4(g)+Pd(111) - CH3*+H*+Pd(111)	0.28	-0.28	0.45	3.89	1.628	0.1
CH4(g)+Pt(111) - CH3*+H*+Pt(111)	0.16	-0.76	0.65	5.84	2.058	-0.1318
C2H6(g)+Ag(111) - 2CH3*+Ag(111)	2.13	2.95	0.46	2.95	1.2443	3.2599
C2H6(g)+Au(111) - 2CH3*+Au(111)	1.55	2.59	0.58	3.81	2.0643	2.8922
C2H6(g)+Co(111) - 2CH3*+Co(111)	0.53	0.53	0.54	4.39	1.8843	0.9519
C2H6(g)+Cu(111) - 2CH3*+Cu(111)	1.46	2.05	0.5	3.49	1.6143	2.3796
C2H6(g)+Ir(111) - 2CH3*+Ir(111)	0.19	-0.1	0.78	6.94	2.3243	0.6834
C2H6(g)+Ni(111) - 2CH3*+Ni(111)	0.47	1.04	0.57	4.44	2.0043	1.4482
C2H6(g)+Pd(111) - 2CH3*+Pd(111)	0.6	-1.89	0.54	3.89	2.1143	-1.6148
C2H6(g)+Pt(111) - 2CH3*+Pt(111)	-0.04	0.09	0.7	5.84	2.5443	0.6398
CO2(g)+Ag(111) - CO*+O*+Ag(111)	2.68	2.67	0.39	2.95	-0.1854	3.2354
CO2(g)+Au(111) - CO*+O*+Au(111)	3.29	3.73	0.53	3.81	0.6346	4.3045
CO2(g)+Cu(111) - CO*+O*+Cu(111)	1.29	1.22	0.38	3.49	0.1846	1.8004
CO2(g)+Pt(111) - CO*+O*+Pt(111)	0.96	0.49	0.63	5.84	1.1146	1.311
0.5H2(g)+Co(111) - H*+Co(111)	-0.35	-0.96	0.43	4.39	0.5709	-0.3062
0.5H2(g)+Ni(111) - H*+Ni(111)	-0.35	-1.01	0.45	4.44	0.6909	-0.3652
0.5H2(g)+Pd(111) - H*+Pd(111)	-0.28	-1.23	0.42	3.89	0.8009	-0.7079
0.5H2(g)+Sc(111) - H*+Sc(111)	-1.0	-1.89	0.48	3.9	-1.6191	-0.9215
H2O(g)+Ag(111) - O*+2H*+Ag(111)	1.13	1.36	0.41	2.95	1.4051	1.6198
H2O(g)+Au(111) - O*+2H*+Au(111)	1.56	1.87	0.56	3.81	2.2251	2.1329
H2O(g)+Co(111) - O*+2H*+Co(111)	-1.15	-3.55	0.64	4.39	2.0451	-3.1886
H2O(g)+Cu(111) - O*+2H*+Cu(111)	0.36	-0.75	0.44	3.49	1.7751	-0.4706
H2O(g)+Pd(111) - O*+2H*+Pd(111)	0.78	-2.8	0.58	3.89	2.2757	-2.5594
H2O(g)+Pt(111) - O*+2H*+Pt(111)	0.69	-1.72	0.73	5.84	2.7051	-1.2177
H2O(g)+Sc(111) - O*+2H*+Sc(111)	-5.76	-8.42	0.64	3.9	-0.1449	-7.7727
H2S(g)+Ag(111) - S*+2H*+Ag(111)	0.38	1.13	0.4	2.95	1.4051	1.3965
H2S(g)+Al(111) - S*+2H*+Al(111)	-1.16	-1.84	0.45	3.39	1.4051	-1.5256
H2S(g)+Au(111) - S*+2H*+Au(111)	0.47	1.15	0.53	3.81	2.2251	1.4101
H2S(g)+Co(111) - S*+2H*+Co(111)	-2.78	-3.33	0.57	4.39	1.2644	-2.8218
H2S(g)+Cu(111) - S*+2H*+Cu(111)	-1.2	-0.63	0.44	3.49	1.7751	-0.3568
H2S(g)+Ir(111) - S*+2H*+Ir(111)	-2.59	-3.1	0.81	6.94	1.7751	-2.2359
H2S(g)+Pd(111) - S*+2H*+Pd(111)	-1.91	-3.68	0.58	3.89	1.7751	-3.3603
H2S(g)+Pt(111) - S*+2H*+Pt(111)	-2.14	-3.04	0.78	5.84	2.7051	-2.5489
H2S(g)+Sc(111) - S*+2H*+Sc(111)	-5.48	-6.33	0.61	3.9	-0.9256	-5.5244
H2S(g)+Y(111) - S*+2H*+Y(111)	-5.42	-6.44	0.6	4.37	-0.1556	-5.6962
0.5N2(g)+Co(111) - N*+Co(111)	-0.41	-2.47	0.53	4.39	-1.4546	-1.4546
0.5N2(g)+Ni(111) - N*+Ni(111)	0.14	-1.06	0.48	4.44	-1.3346	-0.0483
0.5N2(g)+Pd(111) - N*+Pd(111)	1.1	-0.52	0.43	3.89	-1.2246	0.3808
0.5N2(g)+Sc(111) - N*+Sc(111)	-2.74	-4.46	0.7	3.9	-3.6446	-3.137
NH3(g)+Ag(111) - N*+3H*+Ag(111)	4.9	4.66	0.66	2.95	-2.8346	5.7323
NH3(g)+Al(111) - N*+3H*+Al(111)	0.55	-0.53	0.34	3.39	0.6707	-0.0675
NH3(g)+Au(111) - N*+3H*+Au(111)	4.54	4.48	0.63	3.81	1.8307	4.8341
NH3(g)+Co(111) - N*+3H*+Co(111)	-0.98	-1.85	0.54	4.39	1.6507	-1.3996
NH3(g)+Cu(111) - N*+3H*+Cu(111)	2.11	2.29	0.49	3.49	1.3807	2.6636
NH3(g)+Ir(111) - N*+3H*+Ir(111)	-0.07	-1.46	0.77	6.94	2.0907	-0.6442
NH3(g)+Pd(111) - N*+3H*+Pd(111)	0.96	-2.34	0.54	3.89	1.8807	-2.0272
NH3(g)+Pt(111) - N*+3H*+Pt(111)	0.62	-1.55	0.7	5.84	2.3107	-0.9743
NH3(g)+Sc(111) - N*+3H*+Sc(111)	-4.98	-6.63	0.59	3.9	-0.5393	-5.9013
NO(g)+Ag(111) - N*+O*+Ag(111)	1.88	2.56	0.37	2.95	0.0425	3.0831
NO(g)+Al(111) - N*+O*+Al(111)	-6.37	-5.47	0.5	3.39	-0.2975	-4.8643
NO(g)+Au(111) - N*+O*+Au(111)	2.02	3.5	0.54	3.81	0.8625	4.028
NO(g)+Co(111) - N*+O*+Co(111)	-3.86	-3.67	0.54	4.39	0.6825	-3.0572
NO(g)+Cu(111) - N*+O*+Cu(111)	-0.88	-0.25	0.34	3.49	0.4125	0.2785
NO(g)+Pd(111) - N*+O*+Pd(111)	-0.78	-1.55	0.44	3.89	0.9125	-1.0472
NO(g)+Pt(111) - N*+O*+Pt(111)	-0.93	-0.7	0.6	5.84	1.3425	0.0665
NO(g)+Sc(111) - N*+O*+Sc(111)	-9.69	-9.96	0.78	3.9	-1.5075	-9.0668
N2O(g)+Ag(111) - 2N*+O*+Ag(111)	5.47	5.55	0.54	2.95	-0.7982	6.2541
N2O(g)+Al(111) - 2N*+O*+Al(111)	-7.01	-6.49	0.58	3.39	-1.1382	-5.7299
N2O(g)+Au(111) - 2N*+O*+Au(111)	5.3	6.39	0.6	3.81	0.0218	7.0987
N2O(g)+Co(111) - 2N*+O*+Co(111)	-3.79	-4.3	0.52	4.39	-0.1582	-3.5381
N2O(g)+Cu(111) - 2N*+O*+Cu(111)	1.1	1.1	0.4	3.49	-0.4282	1.7934
N2O(g)+Pd(111) - 2N*+O*+Pd(111)	0.76	-1.61	0.38	3.89	0.0718	-0.9507
N2O(g)+Sc(111) - 2N*+O*+Sc(111)	-11.95	-13.22	0.95	3.9	-2.3482	-12.2038
NO2(g)+Ag(111) - N*+2O*+Ag(111)	2.4	2.14	0.48	2.95	-1.7291	2.9953
NO2(g)+Al(111) - N*+2O*+Al(111)	-9.84	-9.77	0.76	3.39	-2.0691	-8.8631
NO2(g)+Au(111) - N*+2O*+Au(111)	3.0	4.12	0.58	3.81	-0.9091	4.9853
NO2(g)+Co(111) - N*+2O*+Co(111)	-5.54	-6.55	0.66	4.39	-1.0891	-5.6334
NO2(g)+Cu(111) - N*+2O*+Cu(111)	-1.5	-1.81	0.43	3.49	-1.3591	-0.9579
NO2(g)+Pd(111) - N*+2O*+Pd(111)	-0.86	-3.01	0.48	3.89	-0.8591	-2.1909
NO2(g)+Sc(111) - N*+2O*+Sc(111)	-14.88	-16.17	1.11	3.9	-3.2791	-14.9966
0.5O2(g)+Co - O*+Co(111)	-2.83	-3.43	0.52	4.39	-0.6237	-2.5762
0.5O2(g)+Ni - O*+Ni(111)	-2.47	-2.89	0.5	4.44	-0.5037	-2.0397
0.5O2(g)+Pd - O*+Pd(111)	-1.16	-1.88	0.41	3.89	-0.3937	-1.1434
0.5O2(g)+Sc - O*+Sc(111)	-6.13	-7.18	0.75	3.9	-2.8137	-6.0321
