# Supplementary material for: A transferable prediction model of molecular adsorption on metals based on adsorbate and substrate properties
Source: Royal Society of Chemistry journal article supplement (doi:10.1039/d2cp01572b), 2022-01-01
Supplement: d2cp01572b2.csv [file d2cp01572b2.csv]

Label	Ead_data	Ead_pred	Atom_vol_met	IPEA-W	MBE_2
CH4(g)+Ag(111) - CH3*+H*+Ag(111)	1.99	2.53	2.4837	0.758	2.4837
CH4(g)+Au(111) - CH3*+H*+Au(111)	1.51	2.25	2.034	1.578	2.034
CH4(g)+Co(111) - CH3*+H*+Co(111)	0.31	0.41	0.1698	1.398	0.1698
CH4(g)+Cu(111) - CH3*+H*+Cu(111)	1.05	1.72	1.5727	1.128	1.5727
CH4(g)+Ir(111) - CH3*+H*+Ir(111)	0.15	0.46	0.137	1.838	0.137
CH4(g)+Ni(111) - CH3*+H*+Ni(111)	0.41	0.62	0.3589	1.518	0.3589
CH4(g)+Pd(111) - CH3*+H*+Pd(111)	0.28	0.39	0.1	1.628	0.1
CH4(g)+Pt(111) - CH3*+H*+Pt(111)	0.16	0.24	-0.1318	2.058	-0.1318
C2H6(g)+Ag(111) - 2CH3*+Ag(111)	2.13	3.37	3.2599	1.2443	3.2599
C2H6(g)+Au(111) - 2CH3*+Au(111)	1.55	3.16	2.8922	2.0643	2.8922
C2H6(g)+Co(111) - 2CH3*+Co(111)	0.53	1.25	0.9519	1.8843	0.9519
C2H6(g)+Cu(111) - 2CH3*+Cu(111)	1.46	2.59	2.3796	1.6143	2.3796
C2H6(g)+Ir(111) - 2CH3*+Ir(111)	0.19	1.07	0.6834	2.3243	0.6834
C2H6(g)+Ni(111) - 2CH3*+Ni(111)	0.47	1.76	1.4482	2.0043	1.4482
C2H6(g)+Pd(111) - 2CH3*+Pd(111)	0.6	-1.18	-1.6148	2.1143	-1.6148
C2H6(g)+Pt(111) - 2CH3*+Pt(111)	-0.04	1.07	0.6398	2.5443	0.6398
CO2(g)+Ag(111) - CO*+O*+Ag(111)	2.68	3.09	3.2354	-0.1854	3.2354
CO2(g)+Au(111) - CO*+O*+Au(111)	3.29	4.27	4.3045	0.6346	4.3045
CO2(g)+Cu(111) - CO*+O*+Cu(111)	1.29	1.77	1.8004	0.1846	1.8004
CO2(g)+Pt(111) - CO*+O*+Pt(111)	0.96	1.46	1.311	1.1146	1.311
0.5H2(g)+Co(111) - H*+Co(111)	-0.35	-0.19	-0.3062	0.5709	-0.3062
0.5H2(g)+Ni(111) - H*+Ni(111)	-0.35	-0.23	-0.3652	0.6909	-0.3652
0.5H2(g)+Pd(111) - H*+Pd(111)	-0.28	-0.54	-0.7079	0.8009	-0.7079
0.5H2(g)+Sc(111) - H*+Sc(111)	-1.0	-1.18	-0.9215	-1.6191	-0.9215
H2O(g)+Ag(111) - O*+2H*+Ag(111)	1.13	1.81	1.6198	1.4051	1.6198
H2O(g)+Au(111) - O*+2H*+Au(111)	1.56	2.46	2.1329	2.2251	2.1329
H2O(g)+Co(111) - O*+2H*+Co(111)	-1.15	-2.72	-3.1886	2.0451	-3.1886
H2O(g)+Cu(111) - O*+2H*+Cu(111)	0.36	-0.14	-0.4706	1.7751	-0.4706
H2O(g)+Pd(111) - O*+2H*+Pd(111)	0.78	-2.07	-2.5594	2.2757	-2.5594
H2O(g)+Pt(111) - O*+2H*+Pt(111)	0.69	-0.69	-1.2177	2.7051	-1.2177
H2O(g)+Sc(111) - O*+2H*+Sc(111)	-5.76	-7.53	-7.7727	-0.1449	-7.7727
H2S(g)+Ag(111) - S*+2H*+Ag(111)	0.38	1.6	1.3965	1.4051	1.3965
H2S(g)+Al(111) - S*+2H*+Al(111)	-1.16	-1.22	-1.5256	1.4051	-1.5256
H2S(g)+Au(111) - S*+2H*+Au(111)	0.47	1.76	1.4101	2.2251	1.4101
H2S(g)+Co(111) - S*+2H*+Co(111)	-2.78	-2.5	-2.8218	1.2644	-2.8218
H2S(g)+Cu(111) - S*+2H*+Cu(111)	-1.2	-0.03	-0.3568	1.7751	-0.3568
H2S(g)+Ir(111) - S*+2H*+Ir(111)	-2.59	-1.84	-2.2359	1.7751	-2.2359
H2S(g)+Pd(111) - S*+2H*+Pd(111)	-1.91	-2.93	-3.3603	1.7751	-3.3603
H2S(g)+Pt(111) - S*+2H*+Pt(111)	-2.14	-1.98	-2.5489	2.7051	-2.5489
H2S(g)+Sc(111) - S*+2H*+Sc(111)	-5.48	-5.5	-5.5244	-0.9256	-5.5244
H2S(g)+Y(111) - S*+2H*+Y(111)	-5.42	-5.53	-5.6962	-0.1556	-5.6962
0.5N2(g)+Co(111) - N*+Co(111)	-0.41	-1.66	-1.4546	-1.4546	-1.4546
0.5N2(g)+Ni(111) - N*+Ni(111)	0.14	-0.28	-0.0483	-1.3346	-0.0483
0.5N2(g)+Pd(111) - N*+Pd(111)	1.1	0.15	0.3808	-1.2246	0.3808
0.5N2(g)+Sc(111) - N*+Sc(111)	-2.74	-3.68	-3.137	-3.6446	-3.137
NH3(g)+Ag(111) - N*+3H*+Ag(111)	4.9	5.03	5.7323	-2.8346	5.7323
NH3(g)+Al(111) - N*+3H*+Al(111)	0.55	0.05	-0.0675	0.6707	-0.0675
NH3(g)+Au(111) - N*+3H*+Au(111)	4.54	4.99	4.8341	1.8307	4.8341
NH3(g)+Co(111) - N*+3H*+Co(111)	-0.98	-1.06	-1.3996	1.6507	-1.3996
NH3(g)+Cu(111) - N*+3H*+Cu(111)	2.11	2.82	2.6636	1.3807	2.6636
NH3(g)+Ir(111) - N*+3H*+Ir(111)	-0.07	-0.25	-0.6442	2.0907	-0.6442
NH3(g)+Pd(111) - N*+3H*+Pd(111)	0.96	-1.62	-2.0272	1.8807	-2.0272
NH3(g)+Pt(111) - N*+3H*+Pt(111)	0.62	-0.53	-0.9743	2.3107	-0.9743
NH3(g)+Sc(111) - N*+3H*+Sc(111)	-4.98	-5.8	-5.9013	-0.5393	-5.9013
NO(g)+Ag(111) - N*+O*+Ag(111)	1.88	2.99	3.0831	0.0425	3.0831
NO(g)+Al(111) - N*+O*+Al(111)	-6.37	-4.75	-4.8643	-0.2975	-4.8643
NO(g)+Au(111) - N*+O*+Au(111)	2.02	4.04	4.028	0.8625	4.028
NO(g)+Co(111) - N*+O*+Co(111)	-3.86	-2.83	-3.0572	0.6825	-3.0572
NO(g)+Cu(111) - N*+O*+Cu(111)	-0.88	0.34	0.2785	0.4125	0.2785
NO(g)+Pd(111) - N*+O*+Pd(111)	-0.78	-0.85	-1.0472	0.9125	-1.0472
NO(g)+Pt(111) - N*+O*+Pt(111)	-0.93	0.3	0.0665	1.3425	0.0665
NO(g)+Sc(111) - N*+O*+Sc(111)	-9.69	-9.02	-9.0668	-1.5075	-9.0668
N2O(g)+Ag(111) - 2N*+O*+Ag(111)	5.47	5.9	6.2541	-0.7982	6.2541
N2O(g)+Al(111) - 2N*+O*+Al(111)	-7.01	-5.74	-5.7299	-1.1382	-5.7299
N2O(g)+Au(111) - 2N*+O*+Au(111)	5.3	6.86	7.0987	0.0218	7.0987
N2O(g)+Co(111) - 2N*+O*+Co(111)	-3.79	-3.45	-3.5381	-0.1582	-3.5381
N2O(g)+Cu(111) - 2N*+O*+Cu(111)	1.1	1.66	1.7934	-0.4282	1.7934
N2O(g)+Pd(111) - 2N*+O*+Pd(111)	0.76	-0.91	-0.9507	0.0718	-0.9507
N2O(g)+Sc(111) - 2N*+O*+Sc(111)	-11.95	-12.2	-12.2038	-2.3482	-12.2038
NO2(g)+Ag(111) - N*+2O*+Ag(111)	2.4	2.58	2.9953	-1.7291	2.9953
NO2(g)+Al(111) - N*+2O*+Al(111)	-9.84	-8.93	-8.8631	-2.0691	-8.8631
NO2(g)+Au(111) - N*+2O*+Au(111)	3.0	4.65	4.9853	-0.9091	4.9853
NO2(g)+Co(111) - N*+2O*+Co(111)	-5.54	-5.63	-5.6334	-1.0891	-5.6334
NO2(g)+Cu(111) - N*+2O*+Cu(111)	-1.5	-1.17	-0.9579	-1.3591	-0.9579
NO2(g)+Pd(111) - N*+2O*+Pd(111)	-0.86	-2.27	-2.1909	-0.8591	-2.1909
NO2(g)+Sc(111) - N*+2O*+Sc(111)	-14.88	-15.07	-14.9966	-3.2791	-14.9966
0.5O2(g)+Co - O*+Co(111)	-2.83	-2.6	-2.5762	-0.6237	-2.5762
0.5O2(g)+Ni - O*+Ni(111)	-2.47	-2.06	-2.0397	-0.5037	-2.0397
0.5O2(g)+Pd - O*+Pd(111)	-1.16	-1.17	-1.1434	-0.3937	-1.1434
0.5O2(g)+Sc - O*+Sc(111)	-6.13	-6.33	-6.0321	-2.8137	-6.0321
