# Supplementary material for: A transferable prediction model of molecular adsorption on metals based on adsorbate and substrate properties
Source: Royal Society of Chemistry journal article supplement (doi:10.1039/d2cp01572b), 2022-01-01
Supplement: d2cp01572b3.csv [file d2cp01572b3.csv]

Label	Ead_data	Ead_pred	Ead_pred_err	CE	IPEA-W	MBE_2
CH4(g)+Ag(111) - CH3*+H*+Ag(111)	1.99	2.84	0.82	2.95	0.758	2.4837
CH4(g)+Au(111) - CH3*+H*+Au(111)	1.51	2.39	0.93	3.81	1.578	2.034
CH4(g)+Co(111) - CH3*+H*+Co(111)	0.31	0.41	0.9	4.39	1.398	0.1698
CH4(g)+Cu(111) - CH3*+H*+Cu(111)	1.05	1.91	0.86	3.49	1.128	1.5727
CH4(g)+Ir(111) - CH3*+H*+Ir(111)	0.15	0.01	1.15	6.94	1.838	0.137
CH4(g)+Ni(111) - CH3*+H*+Ni(111)	0.41	0.61	0.92	4.44	1.518	0.3589
CH4(g)+Pd(111) - CH3*+H*+Pd(111)	0.28	0.47	0.87	3.89	1.628	0.1
CH4(g)+Pt(111) - CH3*+H*+Pt(111)	0.16	-0.02	1.07	5.84	2.058	-0.1318
C2H6(g)+Ag(111) - 2CH3*+Ag(111)	2.13	3.7	0.88	2.95	1.2443	3.2599
C2H6(g)+Au(111) - 2CH3*+Au(111)	1.55	3.33	1.0	3.81	2.0643	2.8922
C2H6(g)+Co(111) - 2CH3*+Co(111)	0.53	1.27	0.96	4.39	1.8843	0.9519
C2H6(g)+Cu(111) - 2CH3*+Cu(111)	1.46	2.8	0.92	3.49	1.6143	2.3796
C2H6(g)+Ir(111) - 2CH3*+Ir(111)	0.19	0.65	1.21	6.94	2.3243	0.6834
C2H6(g)+Ni(111) - 2CH3*+Ni(111)	0.47	1.78	0.99	4.44	2.0043	1.4482
C2H6(g)+Pd(111) - 2CH3*+Pd(111)	0.6	-1.15	0.96	3.89	2.1143	-1.6148
C2H6(g)+Pt(111) - 2CH3*+Pt(111)	-0.04	0.83	1.12	5.84	2.5443	0.6398
CO2(g)+Ag(111) - CO*+O*+Ag(111)	2.68	3.41	0.81	2.95	-0.1854	3.2354
CO2(g)+Au(111) - CO*+O*+Au(111)	3.29	4.47	0.95	3.81	0.6346	4.3045
CO2(g)+Cu(111) - CO*+O*+Cu(111)	1.29	1.96	0.8	3.49	0.1846	1.8004
CO2(g)+Pt(111) - CO*+O*+Pt(111)	0.96	1.24	1.05	5.84	1.1146	1.311
0.5H2(g)+Co(111) - H*+Co(111)	-0.35	-0.22	0.85	4.39	0.5709	-0.3062
0.5H2(g)+Ni(111) - H*+Ni(111)	-0.35	-0.26	0.87	4.44	0.6909	-0.3652
0.5H2(g)+Pd(111) - H*+Pd(111)	-0.28	-0.49	0.84	3.89	0.8009	-0.7079
0.5H2(g)+Sc(111) - H*+Sc(111)	-1.0	-1.15	0.9	3.9	-1.6191	-0.9215
H2O(g)+Ag(111) - O*+2H*+Ag(111)	1.13	2.1	0.83	2.95	1.4051	1.6198
H2O(g)+Au(111) - O*+2H*+Au(111)	1.56	2.61	0.98	3.81	2.2251	2.1329
H2O(g)+Co(111) - O*+2H*+Co(111)	-1.15	-2.81	1.06	4.39	2.0451	-3.1886
H2O(g)+Cu(111) - O*+2H*+Cu(111)	0.36	-0.0	0.86	3.49	1.7751	-0.4706
H2O(g)+Pd(111) - O*+2H*+Pd(111)	0.78	-2.05	1.01	3.89	2.2757	-2.5594
H2O(g)+Pt(111) - O*+2H*+Pt(111)	0.69	-0.98	1.15	5.84	2.7051	-1.2177
H2O(g)+Sc(111) - O*+2H*+Sc(111)	-5.76	-7.68	1.06	3.9	-0.1449	-7.7727
H2S(g)+Ag(111) - S*+2H*+Ag(111)	0.38	1.88	0.82	2.95	1.4051	1.3965
H2S(g)+Al(111) - S*+2H*+Al(111)	-1.16	-1.1	0.87	3.39	1.4051	-1.5256
H2S(g)+Au(111) - S*+2H*+Au(111)	0.47	1.89	0.95	3.81	2.2251	1.4101
H2S(g)+Co(111) - S*+2H*+Co(111)	-2.78	-2.59	0.99	4.39	1.2644	-2.8218
H2S(g)+Cu(111) - S*+2H*+Cu(111)	-1.2	0.11	0.86	3.49	1.7751	-0.3568
H2S(g)+Ir(111) - S*+2H*+Ir(111)	-2.59	-2.35	1.23	6.94	1.7751	-2.2359
H2S(g)+Pd(111) - S*+2H*+Pd(111)	-1.91	-2.94	1.0	3.89	1.7751	-3.3603
H2S(g)+Pt(111) - S*+2H*+Pt(111)	-2.14	-2.3	1.2	5.84	2.7051	-2.5489
H2S(g)+Sc(111) - S*+2H*+Sc(111)	-5.48	-5.59	1.03	3.9	-0.9256	-5.5244
H2S(g)+Y(111) - S*+2H*+Y(111)	-5.42	-5.7	1.02	4.37	-0.1556	-5.6962
0.5N2(g)+Co(111) - N*+Co(111)	-0.41	-1.73	0.95	4.39	-1.4546	-1.4546
0.5N2(g)+Ni(111) - N*+Ni(111)	0.14	-0.32	0.9	4.44	-1.3346	-0.0483
0.5N2(g)+Pd(111) - N*+Pd(111)	1.1	0.22	0.86	3.89	-1.2246	0.3808
0.5N2(g)+Sc(111) - N*+Sc(111)	-2.74	-3.72	1.12	3.9	-3.6446	-3.137
NH3(g)+Ag(111) - N*+3H*+Ag(111)	4.9	5.4	1.08	2.95	-2.8346	5.7323
NH3(g)+Al(111) - N*+3H*+Al(111)	0.55	0.21	0.76	3.39	0.6707	-0.0675
NH3(g)+Au(111) - N*+3H*+Au(111)	4.54	5.22	1.05	3.81	1.8307	4.8341
NH3(g)+Co(111) - N*+3H*+Co(111)	-0.98	-1.1	0.96	4.39	1.6507	-1.3996
NH3(g)+Cu(111) - N*+3H*+Cu(111)	2.11	3.04	0.92	3.49	1.3807	2.6636
NH3(g)+Ir(111) - N*+3H*+Ir(111)	-0.07	-0.72	1.19	6.94	2.0907	-0.6442
NH3(g)+Pd(111) - N*+3H*+Pd(111)	0.96	-1.6	0.96	3.89	1.8807	-2.0272
NH3(g)+Pt(111) - N*+3H*+Pt(111)	0.62	-0.81	1.12	5.84	2.3107	-0.9743
NH3(g)+Sc(111) - N*+3H*+Sc(111)	-4.98	-5.89	1.02	3.9	-0.5393	-5.9013
NO(g)+Ag(111) - N*+O*+Ag(111)	1.88	3.3	0.8	2.95	0.0425	3.0831
NO(g)+Al(111) - N*+O*+Al(111)	-6.37	-4.73	0.92	3.39	-0.2975	-4.8643
NO(g)+Au(111) - N*+O*+Au(111)	2.02	4.24	0.96	3.81	0.8625	4.028
NO(g)+Co(111) - N*+O*+Co(111)	-3.86	-2.93	0.96	4.39	0.6825	-3.0572
NO(g)+Cu(111) - N*+O*+Cu(111)	-0.88	0.49	0.76	3.49	0.4125	0.2785
NO(g)+Pd(111) - N*+O*+Pd(111)	-0.78	-0.8	0.86	3.89	0.9125	-1.0472
NO(g)+Pt(111) - N*+O*+Pt(111)	-0.93	0.04	1.02	5.84	1.3425	0.0665
NO(g)+Sc(111) - N*+O*+Sc(111)	-9.69	-9.21	1.2	3.9	-1.5075	-9.0668
N2O(g)+Ag(111) - 2N*+O*+Ag(111)	5.47	6.29	0.96	2.95	-0.7982	6.2541
N2O(g)+Al(111) - 2N*+O*+Al(111)	-7.01	-5.74	1.0	3.39	-1.1382	-5.7299
N2O(g)+Au(111) - 2N*+O*+Au(111)	5.3	7.13	1.02	3.81	0.0218	7.0987
N2O(g)+Co(111) - 2N*+O*+Co(111)	-3.79	-3.56	0.95	4.39	-0.1582	-3.5381
N2O(g)+Cu(111) - 2N*+O*+Cu(111)	1.1	1.84	0.82	3.49	-0.4282	1.7934
N2O(g)+Pd(111) - 2N*+O*+Pd(111)	0.76	-0.86	0.8	3.89	0.0718	-0.9507
N2O(g)+Sc(111) - 2N*+O*+Sc(111)	-11.95	-12.48	1.37	3.9	-2.3482	-12.2038
NO2(g)+Ag(111) - N*+2O*+Ag(111)	2.4	2.89	0.9	2.95	-1.7291	2.9953
NO2(g)+Al(111) - N*+2O*+Al(111)	-9.84	-9.03	1.18	3.39	-2.0691	-8.8631
NO2(g)+Au(111) - N*+2O*+Au(111)	3.0	4.86	1.0	3.81	-0.9091	4.9853
NO2(g)+Co(111) - N*+2O*+Co(111)	-5.54	-5.81	1.08	4.39	-1.0891	-5.6334
NO2(g)+Cu(111) - N*+2O*+Cu(111)	-1.5	-1.06	0.85	3.49	-1.3591	-0.9579
NO2(g)+Pd(111) - N*+2O*+Pd(111)	-0.86	-2.27	0.9	3.89	-0.8591	-2.1909
NO2(g)+Sc(111) - N*+2O*+Sc(111)	-14.88	-15.43	1.53	3.9	-3.2791	-14.9966
0.5O2(g)+Co - O*+Co(111)	-2.83	-2.69	0.94	4.39	-0.6237	-2.5762
0.5O2(g)+Ni - O*+Ni(111)	-2.47	-2.15	0.92	4.44	-0.5037	-2.0397
0.5O2(g)+Pd - O*+Pd(111)	-1.16	-1.14	0.83	3.89	-0.3937	-1.1434
0.5O2(g)+Sc - O*+Sc(111)	-6.13	-6.44	1.17	3.9	-2.8137	-6.0321
