# Supplementary material for: A transferable prediction model of molecular adsorption on metals based on adsorbate and substrate properties
Source: Royal Society of Chemistry journal article supplement (doi:10.1039/d2cp01572b), 2022-01-01
Supplement: d2cp01572b4.csv [file d2cp01572b4.csv]

Label	Ead_data	Ead_pred	Atom_vol_met	IPEA-W	MBE_2
CH4(g)+Ag(111) - CH3*+H*+Ag(111)	1.99	3.32	2.4837	0.758	2.4837
CH4(g)+Au(111) - CH3*+H*+Au(111)	1.51	3.03	2.034	1.578	2.034
CH4(g)+Co(111) - CH3*+H*+Co(111)	0.31	1.2	0.1698	1.398	0.1698
CH4(g)+Cu(111) - CH3*+H*+Cu(111)	1.05	2.51	1.5727	1.128	1.5727
CH4(g)+Ir(111) - CH3*+H*+Ir(111)	0.15	1.25	0.137	1.838	0.137
CH4(g)+Ni(111) - CH3*+H*+Ni(111)	0.41	1.4	0.3589	1.518	0.3589
CH4(g)+Pd(111) - CH3*+H*+Pd(111)	0.28	1.17	0.1	1.628	0.1
CH4(g)+Pt(111) - CH3*+H*+Pt(111)	0.16	1.03	-0.1318	2.058	-0.1318
C2H6(g)+Ag(111) - 2CH3*+Ag(111)	2.13	4.16	3.2599	1.2443	3.2599
C2H6(g)+Au(111) - 2CH3*+Au(111)	1.55	3.95	2.8922	2.0643	2.8922
C2H6(g)+Co(111) - 2CH3*+Co(111)	0.53	2.04	0.9519	1.8843	0.9519
C2H6(g)+Cu(111) - 2CH3*+Cu(111)	1.46	3.37	2.3796	1.6143	2.3796
C2H6(g)+Ir(111) - 2CH3*+Ir(111)	0.19	1.86	0.6834	2.3243	0.6834
C2H6(g)+Ni(111) - 2CH3*+Ni(111)	0.47	2.54	1.4482	2.0043	1.4482
C2H6(g)+Pd(111) - 2CH3*+Pd(111)	0.6	-0.4	-1.6148	2.1143	-1.6148
C2H6(g)+Pt(111) - 2CH3*+Pt(111)	-0.04	1.86	0.6398	2.5443	0.6398
CO2(g)+Ag(111) - CO*+O*+Ag(111)	2.68	3.88	3.2354	-0.1854	3.2354
CO2(g)+Au(111) - CO*+O*+Au(111)	3.29	5.06	4.3045	0.6346	4.3045
CO2(g)+Cu(111) - CO*+O*+Cu(111)	1.29	2.56	1.8004	0.1846	1.8004
CO2(g)+Pt(111) - CO*+O*+Pt(111)	0.96	2.25	1.311	1.1146	1.311
0.5H2(g)+Co(111) - H*+Co(111)	-0.35	0.59	-0.3062	0.5709	-0.3062
0.5H2(g)+Ni(111) - H*+Ni(111)	-0.35	0.56	-0.3652	0.6909	-0.3652
0.5H2(g)+Pd(111) - H*+Pd(111)	-0.28	0.25	-0.7079	0.8009	-0.7079
0.5H2(g)+Sc(111) - H*+Sc(111)	-1.0	-0.39	-0.9215	-1.6191	-0.9215
H2O(g)+Ag(111) - O*+2H*+Ag(111)	1.13	2.6	1.6198	1.4051	1.6198
H2O(g)+Au(111) - O*+2H*+Au(111)	1.56	3.24	2.1329	2.2251	2.1329
H2O(g)+Co(111) - O*+2H*+Co(111)	-1.15	-1.93	-3.1886	2.0451	-3.1886
H2O(g)+Cu(111) - O*+2H*+Cu(111)	0.36	0.65	-0.4706	1.7751	-0.4706
H2O(g)+Pd(111) - O*+2H*+Pd(111)	0.78	-1.28	-2.5594	2.2757	-2.5594
H2O(g)+Pt(111) - O*+2H*+Pt(111)	0.69	0.09	-1.2177	2.7051	-1.2177
H2O(g)+Sc(111) - O*+2H*+Sc(111)	-5.76	-6.75	-7.7727	-0.1449	-7.7727
H2S(g)+Ag(111) - S*+2H*+Ag(111)	0.38	2.39	1.3965	1.4051	1.3965
H2S(g)+Al(111) - S*+2H*+Al(111)	-1.16	-0.44	-1.5256	1.4051	-1.5256
H2S(g)+Au(111) - S*+2H*+Au(111)	0.47	2.54	1.4101	2.2251	1.4101
H2S(g)+Co(111) - S*+2H*+Co(111)	-2.78	-1.71	-2.8218	1.2644	-2.8218
H2S(g)+Cu(111) - S*+2H*+Cu(111)	-1.2	0.76	-0.3568	1.7751	-0.3568
H2S(g)+Ir(111) - S*+2H*+Ir(111)	-2.59	-1.06	-2.2359	1.7751	-2.2359
H2S(g)+Pd(111) - S*+2H*+Pd(111)	-1.91	-2.14	-3.3603	1.7751	-3.3603
H2S(g)+Pt(111) - S*+2H*+Pt(111)	-2.14	-1.19	-2.5489	2.7051	-2.5489
H2S(g)+Sc(111) - S*+2H*+Sc(111)	-5.48	-4.71	-5.5244	-0.9256	-5.5244
H2S(g)+Y(111) - S*+2H*+Y(111)	-5.42	-4.74	-5.6962	-0.1556	-5.6962
0.5N2(g)+Co(111) - N*+Co(111)	-0.41	-0.88	-1.4546	-1.4546	-1.4546
0.5N2(g)+Ni(111) - N*+Ni(111)	0.14	0.5	-0.0483	-1.3346	-0.0483
0.5N2(g)+Pd(111) - N*+Pd(111)	1.1	0.94	0.3808	-1.2246	0.3808
0.5N2(g)+Sc(111) - N*+Sc(111)	-2.74	-2.89	-3.137	-3.6446	-3.137
NH3(g)+Ag(111) - N*+3H*+Ag(111)	4.9	5.82	5.7323	-2.8346	5.7323
NH3(g)+Al(111) - N*+3H*+Al(111)	0.55	0.84	-0.0675	0.6707	-0.0675
NH3(g)+Au(111) - N*+3H*+Au(111)	4.54	5.78	4.8341	1.8307	4.8341
NH3(g)+Co(111) - N*+3H*+Co(111)	-0.98	-0.27	-1.3996	1.6507	-1.3996
NH3(g)+Cu(111) - N*+3H*+Cu(111)	2.11	3.61	2.6636	1.3807	2.6636
NH3(g)+Ir(111) - N*+3H*+Ir(111)	-0.07	0.54	-0.6442	2.0907	-0.6442
NH3(g)+Pd(111) - N*+3H*+Pd(111)	0.96	-0.84	-2.0272	1.8807	-2.0272
NH3(g)+Pt(111) - N*+3H*+Pt(111)	0.62	0.26	-0.9743	2.3107	-0.9743
NH3(g)+Sc(111) - N*+3H*+Sc(111)	-4.98	-5.01	-5.9013	-0.5393	-5.9013
NO(g)+Ag(111) - N*+O*+Ag(111)	1.88	3.77	3.0831	0.0425	3.0831
NO(g)+Al(111) - N*+O*+Al(111)	-6.37	-3.96	-4.8643	-0.2975	-4.8643
NO(g)+Au(111) - N*+O*+Au(111)	2.02	4.83	4.028	0.8625	4.028
NO(g)+Co(111) - N*+O*+Co(111)	-3.86	-2.04	-3.0572	0.6825	-3.0572
NO(g)+Cu(111) - N*+O*+Cu(111)	-0.88	1.13	0.2785	0.4125	0.2785
NO(g)+Pd(111) - N*+O*+Pd(111)	-0.78	-0.06	-1.0472	0.9125	-1.0472
NO(g)+Pt(111) - N*+O*+Pt(111)	-0.93	1.09	0.0665	1.3425	0.0665
NO(g)+Sc(111) - N*+O*+Sc(111)	-9.69	-8.24	-9.0668	-1.5075	-9.0668
N2O(g)+Ag(111) - 2N*+O*+Ag(111)	5.47	6.68	6.2541	-0.7982	6.2541
N2O(g)+Al(111) - 2N*+O*+Al(111)	-7.01	-4.95	-5.7299	-1.1382	-5.7299
N2O(g)+Au(111) - 2N*+O*+Au(111)	5.3	7.65	7.0987	0.0218	7.0987
N2O(g)+Co(111) - 2N*+O*+Co(111)	-3.79	-2.66	-3.5381	-0.1582	-3.5381
N2O(g)+Cu(111) - 2N*+O*+Cu(111)	1.1	2.44	1.7934	-0.4282	1.7934
N2O(g)+Pd(111) - 2N*+O*+Pd(111)	0.76	-0.12	-0.9507	0.0718	-0.9507
N2O(g)+Sc(111) - 2N*+O*+Sc(111)	-11.95	-11.42	-12.2038	-2.3482	-12.2038
NO2(g)+Ag(111) - N*+2O*+Ag(111)	2.4	3.37	2.9953	-1.7291	2.9953
NO2(g)+Al(111) - N*+2O*+Al(111)	-9.84	-8.14	-8.8631	-2.0691	-8.8631
NO2(g)+Au(111) - N*+2O*+Au(111)	3.0	5.44	4.9853	-0.9091	4.9853
NO2(g)+Co(111) - N*+2O*+Co(111)	-5.54	-4.85	-5.6334	-1.0891	-5.6334
NO2(g)+Cu(111) - N*+2O*+Cu(111)	-1.5	-0.38	-0.9579	-1.3591	-0.9579
NO2(g)+Pd(111) - N*+2O*+Pd(111)	-0.86	-1.48	-2.1909	-0.8591	-2.1909
NO2(g)+Sc(111) - N*+2O*+Sc(111)	-14.88	-14.28	-14.9966	-3.2791	-14.9966
0.5O2(g)+Co - O*+Co(111)	-2.83	-1.81	-2.5762	-0.6237	-2.5762
0.5O2(g)+Ni - O*+Ni(111)	-2.47	-1.27	-2.0397	-0.5037	-2.0397
0.5O2(g)+Pd - O*+Pd(111)	-1.16	-0.39	-1.1434	-0.3937	-1.1434
0.5O2(g)+Sc - O*+Sc(111)	-6.13	-5.54	-6.0321	-2.8137	-6.0321
