# Supplementary material for: A transferable prediction model of molecular adsorption on metals based on adsorbate and substrate properties
Source: Royal Society of Chemistry journal article supplement (doi:10.1039/d2cp01572b), 2022-01-01
Supplement: d2cp01572b5.csv [file d2cp01572b5.csv]

Label	Ead_data	Ead_pred	CE	IPEA-W	MBE_2
Cl2(g)+Ag(111) - 2Cl*+Ag(111)	-1.5	-1.55	2.95	-1.9253	-1.4316
Cl2(g)+Al(111) - 2Cl*+Al(111)	-1.77	-2.17	3.39	-2.2653	-1.9186
Cl2(g)+Au(111) - 2Cl*+Au(111)	-0.71	-0.6	3.81	-1.1053	-0.4769
Cl2(g)+Cu(111) - 2Cl*+Cu(111)	-1.75	-1.74	3.49	-1.5553	-1.6029
Cl2(g)+Fe(100) - 2Cl*+Fe(100)	-4.03	-5.67	4.28	-2.3053	-5.2798
Cl2(g)+Fe(110) - 2Cl*+Fe(110)	-4.16	-4.89	4.28	-1.4753	-4.6521
Cl2(g)+Ir(111) - 2Cl*+Ir(111)	-1.34	-1.44	6.94	-0.8453	-0.8244
Cl2(g)+Pt(111) - 2Cl*+Pt(111)	-0.92	-1.12	5.84	-0.6253	-0.7368
Cl2(g)+V(100) - 2Cl*+V(100)	-5.44	-5.56	5.31	-2.6753	-4.9209
Cl2(g)+V(110) - 2Cl*+V(110)	-6.29	-5.51	5.31	-1.5953	-5.0759
CO2(g)+Fe(100) - CO*+O*+Fe(100)	-2.1	-1.48	4.28	-0.5654	-1.3852
CO2(g)+Fe(110) - CO*+O*+Fe(110)	-1.61	-1.01	4.28	0.2646	-1.0642
CO2(g)+V(100) - CO*+O*+V(100)	-5.3	-3.93	5.31	-0.9354	-3.6052
CO2(g)+V(110) - CO*+O*+V(110)	-3.74	-2.52	5.31	0.1446	-2.382
F2(g)+Ag(111) - 2F*+Ag(111)	-2.39	-2.85	2.95	-3.6774	-2.418
F2(g)+Al(111) - 2F*+Al(111)	-3.54	-4.18	3.39	-4.0174	-3.6211
F2(g)+Au(111) - 2F*+Au(111)	-1.43	-1.72	3.81	-2.8574	-1.2823
F2(g)+Cu(111) - 2F*+Cu(111)	-2.65	-3.04	3.49	-3.2274	-2.6034
F2(g)+Fe(100) - 2F*+Fe(100)	-6.85	-8.26	4.28	-3.3074	-7.7075
F2(g)+Fe(110) - 2F*+Fe(110)	-7.54	-7.39	4.28	-4.0574	-6.6893
F2(g)+Ir(111) - 2F*+Ir(111)	-1.83	-2.43	6.94	-2.5974	-1.5054
F2(g)+Pt(111) - 2F*+Pt(111)	-1.29	-1.81	5.84	-2.3774	-1.1083
F2(g)+V(100) - 2F*+V(100)	-8	-7.69	5.31	-4.4274	-6.7451
F2(g)+V(110) - 2F*+V(110)	-9.49	-8.34	5.31	-3.3474	-7.6036
H2(g)+Ag(111) - 2H*+Ag(111)	0.2	1.07	2.95	-0.0691	0.8538
H2(g)+Al(111) - 2H*+Al(111)	0.39	0.34	3.39	-0.4091	0.266
H2(g)+Au(111) - 2H*+Au(111)	0.24	0.8	3.81	0.7509	0.5878
H2(g)+Cu(111) - 2H*+Cu(111)	-0.19	0.57	3.49	0.3009	0.3829
H2(g)+Fe(100) - 2H*+Fe(100)	-0.79	-0.44	4.28	-0.4491	-0.3627
H2(g)+Fe(110) - 2H*+Fe(110)	-1.39	-0.54	4.28	0.3809	-0.6167
H2(g)+Ir(111) - 2H*+Ir(111)	-0.35	-0.48	6.94	1.0109	-0.2047
H2(g)+Pt(111) - 2H*+Pt(111)	-0.41	-0.49	5.84	1.2309	-0.4517
H2(g)+V(100) - 2H*+V(100)	-1.41	-1.53	5.31	-0.8191	-1.2065
H2(g)+V(110) - 2H*+V(110)	-1.7	-1.53	5.31	0.2609	-1.405
H2O(g)+Fe(100) - O*+2H*+Fe(100)	-1.49	-3.07	4.28	1.0251	-3.2809
H2O(g)+Fe(110) - O*+2H*+Fe(110)	-1.66	-3.09	4.28	1.8551	-3.4577
H2O(g)+V(100) - O*+2H*+V(100)	-4.06	-5.34	5.31	0.6551	-5.3169
H2O(g)+V(110) - O*+2H*+V(110)	-4.04	-5.32	5.31	1.7351	-5.4969
H2S(g)+Fe(100) - S*+2H*+Fe(100)	-3.17	-2.86	4.28	0.2444	-2.9223
H2S(g)+Fe(110) - S*+2H*+Fe(110)	-3.07	-2.71	4.28	1.0744	-2.9333
H2S(g)+V(100) - S*+2H*+V(100)	-4.98	-4.78	5.31	-0.1256	-4.6118
H2S(g)+V(110) - S*+2H*+V(110)	-4.66	-4.46	5.31	0.9544	-4.4876
N2(g)+Ag(111) - 2N*+Ag(111)	3.09	2.99	2.95	-2.0946	3.1709
N2(g)+Al(111) - 2N*+Al(111)	-0.98	-1.15	3.39	-2.4346	-0.8655
N2(g)+Au(111) - 2N*+Au(111)	3.11	2.89	3.81	-1.2746	3.0707
N2(g)+Cu(111) - 2N*+Cu(111)	1.52	1.32	3.49	-1.7246	1.5149
N2(g)+Fe(100) - 2N*+Fe(100)	-2.37	-2.11	4.28	-2.4746	-1.6652
N2(g)+Fe(110) - 2N*+Fe(110)	-0.89	-1.01	4.28	-1.6446	-0.7156
N2(g)+Ir(111) - 2N*+Ir(111)	-0.03	-0.68	6.94	-1.0146	-0.0301
N2(g)+Pt(111) - 2N*+Pt(111)	0.77	-0.04	5.84	-0.7946	0.3808
N2(g)+V(100) - 2N*+V(100)	-6.25	-4.91	5.31	-2.8446	-4.2402
N2(g)+V(110) - 2N*+V(110)	-3.26	-3.58	5.31	-1.7646	-3.0972
O2(g)+Ag(111) - 2O*+Ag(111)	-0.24	-0.09	2.95	-1.2637	-0.0878
O2(g)+Al(111) - 2O*+Al(111)	-3.91	-4.11	3.39	-1.6037	-3.9988
O2(g)+Au(111) - 2O*+Au(111)	0.53	0.95	3.81	-0.4437	0.9573
O2(g)+Cu(111) - 2O*+Cu(111)	-1.41	-1.26	3.49	-0.8937	-1.2364
O2(g)+Fe(100) - 2O*+Fe(100)	-6.16	-5.48	4.28	-1.6437	-5.2132
O2(g)+Fe(110) - 2O*+Fe(110)	-5.86	-5.79	4.28	-0.8137	-5.682
O2(g)+Ir(111) - 2O*+Ir(111)	-1.54	-1.43	6.94	-0.1837	-0.9405
O2(g)+Pt(111) - 2O*+Pt(111)	-0.62	-0.58	5.84	0.0363	-0.3143
O2(g)+V(100) - 2O*+V(100)	-9.84	-8.71	5.31	-2.0137	-8.2209
O2(g)+V(110) - 2O*+V(110)	-9.41	-8.47	5.31	-0.9337	-8.1837
