# Supplementary material for: A transferable prediction model of molecular adsorption on metals based on adsorbate and substrate properties
Source: Royal Society of Chemistry journal article supplement (doi:10.1039/d2cp01572b), 2022-01-01
Supplement: d2cp01572b6.csv [file d2cp01572b6.csv]

Label	Ead_data	Ead_pred	CE	IPEA-W	MBE_2
Cl2(g)+Ag(111) - 2Cl*+Ag(111)	-1.5	-1.68	2.95	-1.9253	0.728
Cl2(g)+Al(111) - 2Cl*+Al(111)	-1.77	-2.2	3.39	-2.2653	-0.3583
Cl2(g)+Au(111) - 2Cl*+Au(111)	-0.71	-1.67	3.81	-1.1053	1.8535
Cl2(g)+Cu(111) - 2Cl*+Cu(111)	-1.75	-1.77	3.49	-1.5553	1.1052
Cl2(g)+Fe(100) - 2Cl*+Fe(100)	-4.03	-3.36	4.28	-2.3053	4.9984
Cl2(g)+Fe(110) - 2Cl*+Fe(110)	-4.16	-2.62	4.28	-1.4753	4.9984
Cl2(g)+Ir(111) - 2Cl*+Ir(111)	-1.34	-4	6.94	-0.8453	5.0623
Cl2(g)+Pt(111) - 2Cl*+Pt(111)	-0.92	-2.85	5.84	-0.6253	3.2932
Cl2(g)+V(100) - 2Cl*+V(100)	-5.44	-4.4	5.31	-2.6753	4.5816
Cl2(g)+V(110) - 2Cl*+V(110)	-6.29	-3.44	5.31	-1.5953	4.5816
CO2(g)+Fe(100) - CO*+O*+Fe(100)	-2.1	-2.19	4.28	-0.5654	9.2541
CO2(g)+Fe(110) - CO*+O*+Fe(110)	-1.61	-1.45	4.28	0.2646	9.2541
CO2(g)+V(100) - CO*+O*+V(100)	-5.3	-3.16	5.31	-0.9354	8.1133
CO2(g)+V(110) - CO*+O*+V(110)	-3.74	-2.2	5.31	0.1446	8.1133
F2(g)+Ag(111) - 2F*+Ag(111)	-2.39	-3.18	2.95	-3.6774	0.0687
F2(g)+Al(111) - 2F*+Al(111)	-3.54	-3.57	3.39	-4.0174	-2.5283
F2(g)+Au(111) - 2F*+Au(111)	-1.43	-3.19	3.81	-2.8574	1.3678
F2(g)+Cu(111) - 2F*+Cu(111)	-2.65	-3.18	3.49	-3.2274	0.2091
F2(g)+Fe(100) - 2F*+Fe(100)	-6.85	-4.02	4.28	-3.3074	2.3754
F2(g)+Fe(110) - 2F*+Fe(110)	-7.54	-4.69	4.28	-4.0574	2.3754
F2(g)+Ir(111) - 2F*+Ir(111)	-1.83	-5.49	6.94	-2.5974	4.2724
F2(g)+Pt(111) - 2F*+Pt(111)	-1.29	-4.36	5.84	-2.3774	2.7426
F2(g)+V(100) - 2F*+V(100)	-8	-5.64	5.31	-4.4274	0.9998
F2(g)+V(110) - 2F*+V(110)	-9.49	-4.68	5.31	-3.3474	0.9998
H2(g)+Ag(111) - 2H*+Ag(111)	0.2	-0.17	2.95	-0.0691	2.4246
H2(g)+Al(111) - 2H*+Al(111)	0.39	-0.83	3.39	-0.4091	2.7507
H2(g)+Au(111) - 2H*+Au(111)	0.24	-0.08	3.81	0.7509	2.5281
H2(g)+Cu(111) - 2H*+Cu(111)	-0.19	-0.29	3.49	0.3009	3.0151
H2(g)+Fe(100) - 2H*+Fe(100)	-0.79	-2.16	4.28	-0.4491	10.0968
H2(g)+Fe(110) - 2H*+Fe(110)	-1.39	-1.42	4.28	0.3809	10.0968
H2(g)+Ir(111) - 2H*+Ir(111)	-0.35	-2.45	6.94	1.0109	6.2253
H2(g)+Pt(111) - 2H*+Pt(111)	-0.41	-1.27	5.84	1.2309	4.1138
H2(g)+V(100) - 2H*+V(100)	-1.41	-3.24	5.31	-0.8191	10.1838
H2(g)+V(110) - 2H*+V(110)	-1.7	-2.28	5.31	0.2609	10.1838
H2O(g)+Fe(100) - O*+2H*+Fe(100)	-1.49	-1.08	4.28	1.0251	12.7263
H2O(g)+Fe(110) - O*+2H*+Fe(110)	-1.66	-0.34	4.28	1.8551	12.7263
H2O(g)+V(100) - O*+2H*+V(100)	-4.06	-2.03	5.31	0.6551	11.2842
H2O(g)+V(110) - O*+2H*+V(110)	-4.04	-1.07	5.31	1.7351	11.2842
H2S(g)+Fe(100) - S*+2H*+Fe(100)	-3.17	-1.88	4.28	0.2444	13.8598
H2S(g)+Fe(110) - S*+2H*+Fe(110)	-3.07	-1.14	4.28	1.0744	13.8598
H2S(g)+V(100) - S*+2H*+V(100)	-4.98	-2.93	5.31	-0.1256	13.5567
H2S(g)+V(110) - S*+2H*+V(110)	-4.66	-1.96	5.31	0.9544	13.5567
N2(g)+Ag(111) - 2N*+Ag(111)	3.09	-2.31	2.95	-2.0946	6.1554
N2(g)+Al(111) - 2N*+Al(111)	-0.98	-2.89	3.39	-2.4346	5.6649
N2(g)+Au(111) - 2N*+Au(111)	3.11	-2.21	3.81	-1.2746	6.2051
N2(g)+Cu(111) - 2N*+Cu(111)	1.52	-2.37	3.49	-1.7246	6.1358
N2(g)+Fe(100) - 2N*+Fe(100)	-2.37	-4.18	4.28	-2.4746	12.53
N2(g)+Fe(110) - 2N*+Fe(110)	-0.89	-3.44	4.28	-1.6446	12.53
N2(g)+Ir(111) - 2N*+Ir(111)	-0.03	-4.25	6.94	-1.0146	6.2268
N2(g)+Pt(111) - 2N*+Pt(111)	0.77	-3.25	5.84	-0.7946	6.1181
N2(g)+V(100) - 2N*+V(100)	-6.25	-5.01	5.31	-2.8446	9.8026
N2(g)+V(110) - 2N*+V(110)	-3.26	-4.05	5.31	-1.7646	9.8026
O2(g)+Ag(111) - 2O*+Ag(111)	-0.24	-1.31	2.95	-1.2637	3.2988
O2(g)+Al(111) - 2O*+Al(111)	-3.91	-1.72	3.39	-1.6037	0.882
O2(g)+Au(111) - 2O*+Au(111)	0.53	-1.25	3.81	-0.4437	3.781
O2(g)+Cu(111) - 2O*+Cu(111)	-1.41	-1.36	3.49	-0.8937	3.1048
O2(g)+Fe(100) - 2O*+Fe(100)	-6.16	-2.79	4.28	-1.6437	5.259
O2(g)+Fe(110) - 2O*+Fe(110)	-5.86	-2.05	4.28	-0.8137	5.259
O2(g)+Ir(111) - 2O*+Ir(111)	-1.54	-3.38	6.94	-0.1837	4.7811
O2(g)+Pt(111) - 2O*+Pt(111)	-0.62	-2.29	5.84	0.0363	3.6499
O2(g)+V(100) - 2O*+V(100)	-9.84	-3.6	5.31	-2.0137	2.2008
O2(g)+V(110) - 2O*+V(110)	-9.41	-2.64	5.31	-0.9337	2.2008
