# Supplementary material for: A transferable prediction model of molecular adsorption on metals based on adsorbate and substrate properties
Source: Royal Society of Chemistry journal article supplement (doi:10.1039/d2cp01572b), 2022-01-01
Supplement: d2cp01572b7.csv [file d2cp01572b7.csv]

Label	Ead_data	Ead_pred	CE	IPEA-W	MBE_2
Cl2(g)+Ag(111) - 2Cl*+Ag(111)	-1.5	-1.7	2.95	-1.9253	-2.0378
Cl2(g)+Al(111) - 2Cl*+Al(111)	-1.77	-2.77	3.39	-2.2653	-2.9078
Cl2(g)+Au(111) - 2Cl*+Au(111)	-0.71	-0.79	3.81	-1.1053	-1.037
Cl2(g)+Cu(111) - 2Cl*+Cu(111)	-1.75	-2.14	3.49	-1.5553	-2.3804
Cl2(g)+Fe(100) - 2Cl*+Fe(100)	-4.03	-5.58	4.28	-2.3053	-5.4125
Cl2(g)+Fe(110) - 2Cl*+Fe(110)	-4.16	-4.97	4.28	-1.4753	-4.9587
Cl2(g)+Ir(111) - 2Cl*+Ir(111)	-1.34	-2.36	6.94	-0.8453	-1.7297
Cl2(g)+Pt(111) - 2Cl*+Pt(111)	-0.92	-1.31	5.84	-0.6253	-1.0509
Cl2(g)+V(100) - 2Cl*+V(100)	-5.44	-4.46	5.31	-2.6753	-3.9449
Cl2(g)+V(110) - 2Cl*+V(110)	-6.29	-6.08	5.31	-1.5953	-5.7251
CO2(g)+Fe(100) - CO*+O*+Fe(100)	-2.1	0.15	4.28	-0.5654	-0.075
CO2(g)+Fe(110) - CO*+O*+Fe(110)	-1.61	-1.21	4.28	0.2646	-1.5617
CO2(g)+V(100) - CO*+O*+V(100)	-5.3	-2	5.31	-0.9354	-1.8327
CO2(g)+V(110) - CO*+O*+V(110)	-3.74	-3	5.31	0.1446	-3.0055
F2(g)+Ag(111) - 2F*+Ag(111)	-2.39	-2.86	2.95	-3.6774	-2.868
F2(g)+Al(111) - 2F*+Al(111)	-3.54	-4.54	3.39	-4.0174	-4.3434
F2(g)+Au(111) - 2F*+Au(111)	-1.43	-1.68	3.81	-2.8574	-1.6097
F2(g)+Cu(111) - 2F*+Cu(111)	-2.65	-3.17	3.49	-3.2274	-3.1057
F2(g)+Fe(100) - 2F*+Fe(100)	-6.85	-8.19	4.28	-3.3074	-7.7966
F2(g)+Fe(110) - 2F*+Fe(110)	-7.54	-7.63	4.28	-4.0574	-7.118
F2(g)+Ir(111) - 2F*+Ir(111)	-1.83	-3.01	6.94	-2.5974	-2.0584
F2(g)+Pt(111) - 2F*+Pt(111)	-1.29	-2.09	5.84	-2.3774	-1.5143
F2(g)+V(100) - 2F*+V(100)	-8	-6.95	5.31	-4.4274	-6.0822
F2(g)+V(110) - 2F*+V(110)	-9.49	-8.97	5.31	-3.3474	-8.2674
H2(g)+Ag(111) - 2H*+Ag(111)	0.2	1.07	2.95	-0.0691	0.3618
H2(g)+Al(111) - 2H*+Al(111)	0.39	0.23	3.39	-0.4091	-0.2828
H2(g)+Au(111) - 2H*+Au(111)	0.24	0.88	3.81	0.7509	0.2746
H2(g)+Cu(111) - 2H*+Cu(111)	-0.19	0.43	3.49	0.3009	-0.1779
H2(g)+Fe(100) - 2H*+Fe(100)	-0.79	0.4	4.28	-0.4491	0.1474
H2(g)+Fe(110) - 2H*+Fe(110)	-1.39	-1.12	4.28	0.3809	-1.4895
H2(g)+Ir(111) - 2H*+Ir(111)	-0.35	-0.81	6.94	1.0109	-0.5304
H2(g)+Pt(111) - 2H*+Pt(111)	-0.41	-0.31	5.84	1.2309	-0.3993
H2(g)+V(100) - 2H*+V(100)	-1.41	-1.03	5.31	-0.8191	-0.9003
H2(g)+V(110) - 2H*+V(110)	-1.7	-1.45	5.31	0.2609	-1.5047
H2O(g)+Fe(100) - O*+2H*+Fe(100)	-1.49	-1.59	4.28	1.0251	-2.0742
H2O(g)+Fe(110) - O*+2H*+Fe(110)	-1.66	-3.75	4.28	1.8551	-4.3391
H2O(g)+V(100) - O*+2H*+V(100)	-4.06	-3.82	5.31	0.6551	-3.9062
H2O(g)+V(110) - O*+2H*+V(110)	-4.04	-5.43	5.31	1.7351	-5.6812
H2S(g)+Fe(100) - S*+2H*+Fe(100)	-3.17	-1.13	4.28	0.2444	-1.4806
H2S(g)+Fe(110) - S*+2H*+Fe(110)	-3.07	-3.37	4.28	1.0744	-3.8333
H2S(g)+V(100) - S*+2H*+V(100)	-4.98	-4.18	5.31	-0.1256	-4.1149
H2S(g)+V(110) - S*+2H*+V(110)	-4.66	-4.7	5.31	0.9544	-4.8192
N2(g)+Ag(111) - 2N*+Ag(111)	3.09	2.41	2.95	-2.0946	2.0338
N2(g)+Al(111) - 2N*+Al(111)	-0.98	-1.92	3.39	-2.4346	-2.0446
N2(g)+Au(111) - 2N*+Au(111)	3.11	2.12	3.81	-1.2746	1.8498
N2(g)+Cu(111) - 2N*+Cu(111)	1.52	0.42	3.49	-1.7246	0.1703
N2(g)+Fe(100) - 2N*+Fe(100)	-2.37	-0.41	4.28	-2.4746	-0.2883
N2(g)+Fe(110) - 2N*+Fe(110)	-0.89	-1.16	4.28	-1.6446	-1.1749
N2(g)+Ir(111) - 2N*+Ir(111)	-0.03	-2.24	6.94	-1.0146	-1.5794
N2(g)+Pt(111) - 2N*+Pt(111)	0.77	-0.47	5.84	-0.7946	-0.2014
N2(g)+V(100) - 2N*+V(100)	-6.25	-3.63	5.31	-2.8446	-3.0995
N2(g)+V(110) - 2N*+V(110)	-3.26	-4.74	5.31	-1.7646	-4.3842
O2(g)+Ag(111) - 2O*+Ag(111)	-0.24	-0.65	2.95	-1.2637	-1.1237
O2(g)+Al(111) - 2O*+Al(111)	-3.91	-4.74	3.39	-1.6037	-4.9622
O2(g)+Au(111) - 2O*+Au(111)	0.53	0.43	3.81	-0.4437	0.0375
O2(g)+Cu(111) - 2O*+Cu(111)	-1.41	-1.97	3.49	-0.8937	-2.3334
O2(g)+Fe(100) - 2O*+Fe(100)	-6.16	-4.49	4.28	-1.6437	-4.4496
O2(g)+Fe(110) - 2O*+Fe(110)	-5.86	-5.61	4.28	-0.8137	-5.6992
O2(g)+Ir(111) - 2O*+Ir(111)	-1.54	-2.5	6.94	-0.1837	-1.9894
O2(g)+Pt(111) - 2O*+Pt(111)	-0.62	-0.73	5.84	0.0363	-0.6004
O2(g)+V(100) - 2O*+V(100)	-9.84	-6.44	5.31	-2.0137	-6.0118
O2(g)+V(110) - 2O*+V(110)	-9.41	-8.63	5.31	-0.9337	-8.353
